# Supplementary material for: Development of a non-targeted high-coverage microbial metabolomics pretreatment method and its application to drug resistant Salmonella
Source: Royal Society of Chemistry journal article supplement (doi:10.1039/c9ay02579k), 2020-01-01
Supplement: c9ay02579k1.pdf [file c9ay02579k1.pdf]

**Supporting Information for**  
**A non-targeted high-coverage microbial metabolomics pretreatment method**  
**development and application in drug resistant Salmonella**

YiYun Zhang<sup>1</sup>, Jian Ji<sup>1\*</sup>, MengZhe Lan<sup>2</sup>, Tingwei Wang<sup>1</sup>, Xiulan Sun<sup>1\*</sup>

<sup>1</sup>State Key Laboratory of Food Science and Technology, School of Food Science and Technology,  
National Engineering Research Center for Functional Food, Collaborative Innovation Center of Food  
Safety and Quality Control in Jiangsu Province, Jiangnan University, Wuxi, Jiangsu 214122, People's  
Republic of China

<sup>2</sup> Guangzhou GRG Metrology & Test Co., Ltd., Guangzhou 510630, China

Corresponding author\*: Xiulan Sun, Jian Ji

Address: Jiangnan University, 1800 Lihu Avenue, Wuxi, Jiangsu 214122, China.

E-mail: [sxlzyz@jiangnan.edu.cn](mailto:sxlzyz@jiangnan.edu.cn);

Tel:+86-510-85912330

Fax: 85329015

**Table S1 Metabolites with significant differences in abundance under two quenching methods (fold change value >2 or <0.5 and p value <0.05)**

| <b>Metabolite name</b>  | <b>classify</b> | <b>Fold Change</b> | <b>P-value</b> |
|-------------------------|-----------------|--------------------|----------------|
| 2,6-diaminopimelic acid | Amino acid      | 3.77               | 0.030132       |
| 4-aminobutyric acid     | Amino acid      | 13.2               | 0.004525       |
| 5-Aminovaleric acid     | Amino acid      | 18.22              | 0.001444       |
| 5-Oxoproline            | Amino acid      | 6.75               | 0.000788       |
| alanine                 | Amino acid      | 4.7                | 0.001054       |
| alpha-aminoadipic acid  | Amino acid      | 13.42              | 0.001543       |
| aspartic acid           | Amino acid      | 5.87               | 0.014889       |
| beta alanine            | Amino acid      | 6.79               | 0.012241       |
| citrulline              | Amino acid      | 12.45              | 0.00047        |
| cysteine                | Amino acid      | 14.71              | 0.004548       |
| cysteine-glycine        | Amino acid      | 11.08              | 0.001049       |
| glutamic acid           | Amino acid      | 14.6               | 0.002425       |
| glutamine               | Amino acid      | 8.95               | 0.017625       |
| glycine                 | Amino acid      | 4.01               | 0.000139       |
| glycyl-proline          | Amino acid      | 21.77              | 0.000749       |
| histidine               | Amino acid      | 64.98              | 0.002143       |
| homocystine             | Amino acid      | 12.94              | 0.001064       |
| homoserine              | Amino acid      | 43.88              | 0.000255       |
| isoleucine              | Amino acid      | 11.97              | 0.001154       |
| L-pipecolic acid        | Amino acid      | 7.05               | 0.001455       |
| lysine                  | Amino acid      | 37.77              | 0.006913       |
| methionine              | Amino acid      | 5.76               | 0.001111       |
| methionine sulfoxide    | Amino acid      | 2.05               | 0.003257       |
| N-acetylmethionine      | Amino acid      | 12.23              | 0.000021       |
| ornithine               | Amino acid      | 28.58              | 0.001072       |
| phenylalanine           | Amino acid      | 12.39              | 0.002631       |
| proline                 | Amino acid      | 7.2                | 0.001499       |
| serine                  | Amino acid      | 3.99               | 0.000448       |
| threonine               | Amino acid      | 4.09               | 0.004556       |
| tyrosine                | Amino acid      | 7.26               | 0.002245       |
| 1,5-anhydroglucitol     | Carbohydrate    | 11.99              | 0.001633       |
| 1-Deoxypentitol         | Carbohydrate    | 4.58               | 0.003404       |
| 3-phosphoglycerate      | Carbohydrate    | 20.29              | 0.000335       |
| 6-deoxyglucose          | Carbohydrate    | 5.13               | 0.000036       |
| fructose                | Carbohydrate    | 3.11               | 0.012088       |
| fructose-1-phosphate    | Carbohydrate    | 7.78               | 0.000999       |
| galactinol              | Carbohydrate    | 9.22               | 0.000358       |
| galactitol              | Carbohydrate    | 2.31               | 0.004864       |
| galactose               | Carbohydrate    | 2.04               | 0.001911       |

|                                 |              |        |          |
|---------------------------------|--------------|--------|----------|
| glucose-6-phosphate             | Carbohydrate | 4.64   | 0.033028 |
| glyceric acid                   | Carbohydrate | 8.99   | 0.000171 |
| maltose                         | Carbohydrate | 2.49   | 0.022316 |
| mannose-6-phosphate             | Carbohydrate | 66.61  | 0.000492 |
| myo-inositol                    | Carbohydrate | 8.54   | 0.001104 |
| pantothenic acid                | Carbohydrate | 15.39  | 0.002114 |
| pentonic acid                   | Carbohydrate | 4.99   | 0.003636 |
| pyrophosphate                   | Carbohydrate | 9.42   | 0.001911 |
| ribonic acid                    | Carbohydrate | 3.44   | 0.002408 |
| ribose-5-phosphate              | Carbohydrate | 7.98   | 0.023842 |
| tagatose                        | Carbohydrate | 3.42   | 0.008776 |
| threonic acid                   | Carbohydrate | 38.89  | 0.004951 |
| trehalose                       | Carbohydrate | 11.71  | 0.030036 |
| 1-monopalmitin                  | Lipid        | 2.01   | 0.030055 |
| 2-monopalmitin                  | Lipid        | 2.35   | 0.032797 |
| Beta-Glutamic acid              | Lipid        | 14.38  | 0.002461 |
| Galactosylglycerol              | Lipid        | 8.37   | 0.001919 |
| isohexonic acid                 | Lipid        | 9.64   | 0.002598 |
| 5'-deoxy-5'-methylthioadenosine | Nucleoside   | 3.97   | 0.002896 |
| adenosine-5-monophosphate       | Nucleoside   | 8.62   | 0.000728 |
| cytidine-5-monophosphate        | Nucleoside   | 4.45   | 0.000177 |
| inosine                         | Nucleoside   | 9.2    | 0.000986 |
| inosine-5'-monophosphate        | Nucleoside   | 10.06  | 0.0014   |
| UDP-N-acetylglucosamine         | Nucleoside   | 3.09   | 0.016126 |
| uridine                         | Nucleoside   | 2.22   | 0.010123 |
| uridine-5-monophosphate         | Nucleoside   | 26.78  | 0.010945 |
| xanthosine                      | Nucleoside   | 9.65   | 0.005173 |
| malate                          | Others       | 40.23  | 0.005542 |
| N-acetylputrescine              | Others       | 4.71   | 0.004125 |
| phosphoenolpyruvate             | Others       | 12.12  | 0.000003 |
| succinic acid                   | Others       | 75.34  | 0.000196 |
| putrescine                      | Others       | 15.52  | 0.000005 |
| spermidine                      | Others       | 7.78   | 0.000102 |
| 2,5-Dihydroxypyrazine           | Others       | 3.99   | 0.027092 |
| 5,6-dihydrouracil               | Others       | 32.52  | 0.008658 |
| 5-methoxytryptamine             | Others       | 43.87  | 0.006689 |
| adenine                         | Others       | 3.03   | 0.001096 |
| conduritol-beta-expoxide        | Others       | 11.79  | 0.000623 |
| dehydroascorbic acid            | Others       | 15.03  | 0.001105 |
| guanine                         | Others       | 8.6    | 0.00781  |
| hypoxanthine                    | Others       | 112.07 | 0.00312  |
| nicotinamide                    | Others       | 5.4    | 0.002057 |
| nicotinic acid                  | Others       | 3.26   | 0.002936 |
| serotonin                       | Others       | 9.46   | 0.011313 |

|                             |        |       |          |
|-----------------------------|--------|-------|----------|
| uracil                      | Others | 7     | 0.01203  |
| uric acid                   | Others | 6.83  | 0.000896 |
| xanthine                    | Others | 48.42 | 0.005879 |
| p-Hydroxyphenyl lactic acid | Others | 15.87 | 0.010684 |
| 4-hydroxybenzoate           | Others | 9.99  | 0.000202 |
| noradrenaline               | Others | 14.26 | 0.001581 |
| tyramine                    | Others | 49.24 | 0.000007 |

---

**Fig S1 The top 25 metabolites with the most significant difference between the two quenching methods through the T test**

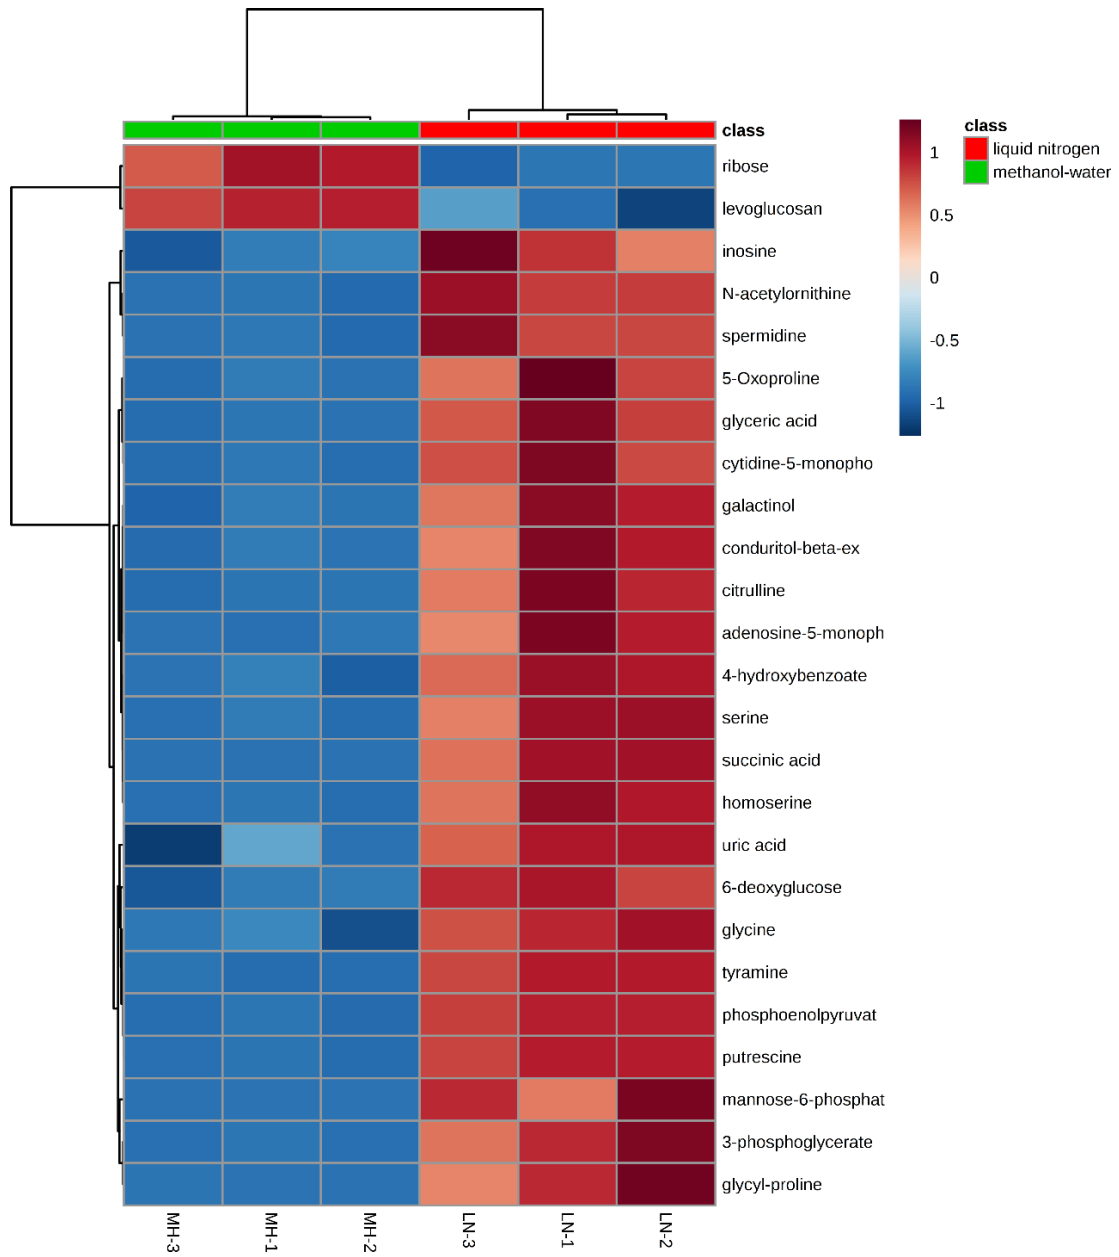

**Table S2 Metabolites with significant differences in abundance under three extraction solvent (fold change value >2 or <0.5 and p value <0.05)**

| <b>Metabolite Name</b>    | <b>Classify</b> | <b>Fold Change</b> | <b>p.value</b> |
|---------------------------|-----------------|--------------------|----------------|
| 2,6-diaminopimelic acid   | Amino acid      | 3.2088             | 0.0051113      |
| aspartic acid             | Amino acid      | 2.1106             | 0.020952       |
| beta alanine              | Amino acid      | 2.2397             | 0.001199       |
| glutathione               | Amino acid      | 0.13926            | 0.040811       |
| histidine                 | Amino acid      | 0.34598            | 0.044294       |
| methionine sulfoxide      | Amino acid      | 0.33335            | 0.011716       |
| 3-phosphoglycerate        | Carbohydrate    | 9.0154             | 0.00094222     |
| galactinol                | Carbohydrate    | 3.6639             | 0.0029633      |
| galactose                 | Carbohydrate    | 3.1917             | 0.00056296     |
| galactose-6-phosphate     | Carbohydrate    | 5.9416             | 0.0079469      |
| glucose                   | Carbohydrate    | 3.3626             | 0.00043157     |
| glucose-1-phosphate       | Carbohydrate    | 7.2806             | 0.00011491     |
| glucose-6-phosphate       | Carbohydrate    | 6.0987             | 0.0011837      |
| glyceric acid             | Carbohydrate    | 2.4575             | 0.0037233      |
| mannose-6-phosphate       | Carbohydrate    | 3.7523             | 0.019332       |
| pyrophosphate             | Carbohydrate    | 4.6509             | 0.00010311     |
| trehalose                 | Carbohydrate    | 0.34233            | 0.012641       |
| xylose                    | Carbohydrate    | 5.3663             | 0.00057144     |
| dodecanol                 | Lipid           | 0.34014            | 0.040288       |
| hexadecylglycerol         | Lipid           | 0.36881            | 0.022847       |
| isohexonic acid           | Lipid           | 2.3676             | 0.0026692      |
| isopentadecanoic acid     | Lipid           | 3.1938             | 0.011571       |
| adenosine                 | Nucleoside      | 2.2897             | 0.0008171      |
| adenosine-5-monophosphate | Nucleoside      | 2.2483             | 0.0076484      |
| inosine                   | Nucleoside      | 6.031              | 0.000041715    |
| UDP-N-acetylglucosamine   | Nucleoside      | 3.2868             | 0.0041404      |
| uridine                   | Nucleoside      | 2.9029             | 0.0027882      |
| uridin-5-monophosphate    | Nucleoside      | 11.624             | 0.0059412      |
| xanthosine                | Nucleoside      | 2.5404             | 0.041721       |

**Fig S2 The top 25 metabolites with the most significant difference under three extraction solvent through the T test**

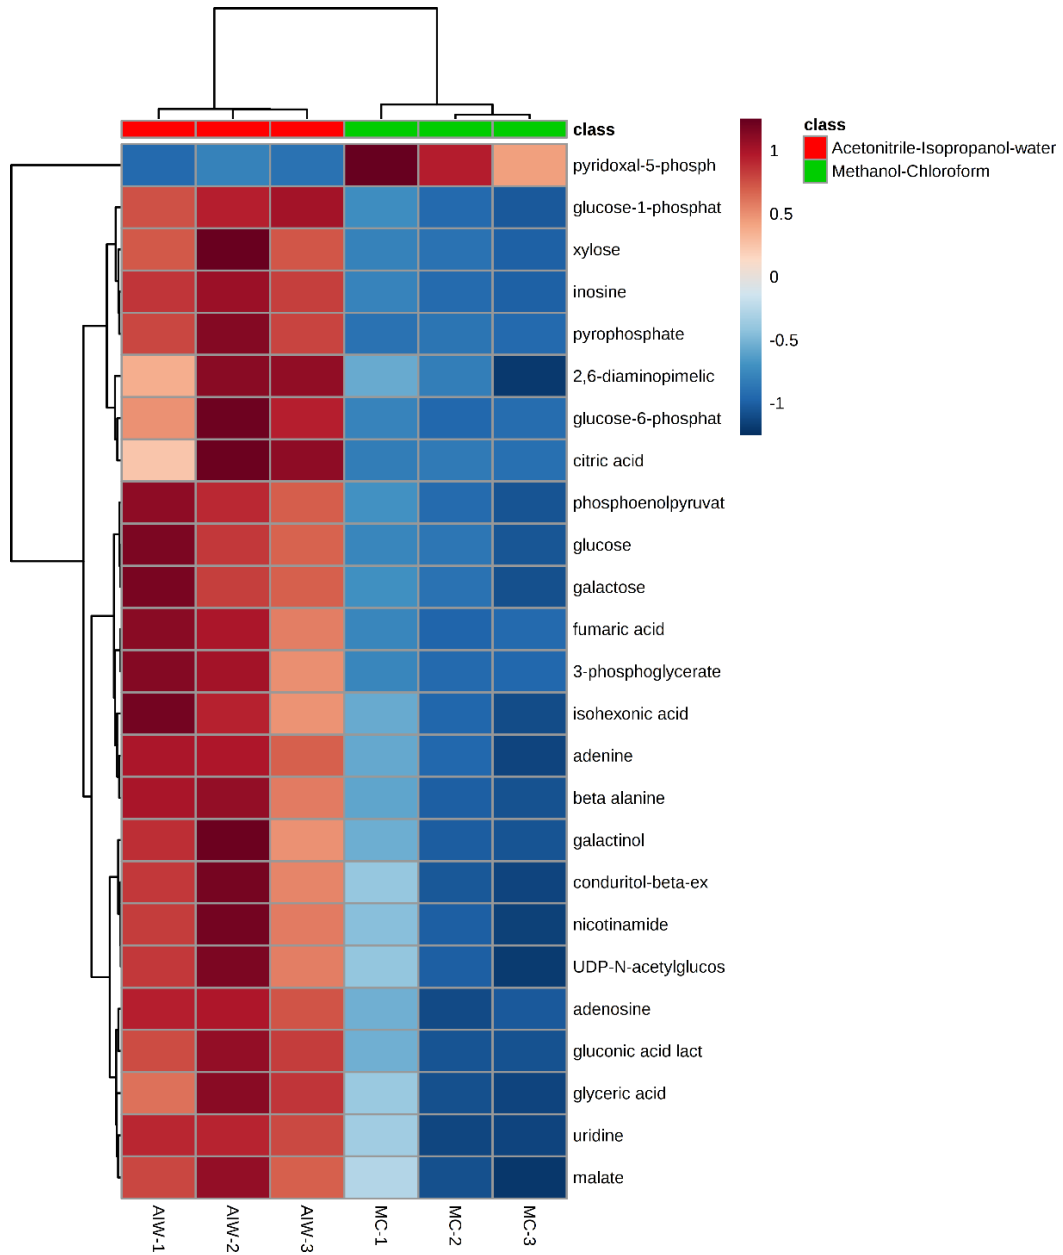

**Table S3 Metabolites with significant differences in abundance under two extraction methods (fold change value >2 or <0.5 and p value <0.05)**

| <b>Metabolite</b>             | <b>Classify</b> | <b>Fold Change</b> | <b>p.value</b> |
|-------------------------------|-----------------|--------------------|----------------|
| 1-monoheptadecanoyl glyceride | Lipid           | 0.44429            | 0.025073       |
| 2-monopalmitin                | Lipid           | 0.49303            | 0.026122       |
| creatinine                    | Amino acid      | 0.31216            | 0.02528        |
| galactose-6-phosphate         | Carbohydrate    | 0.38547            | 0.022987       |
| glucose                       | Carbohydrate    | 0.48719            | 0.000978       |
| glucose-6-phosphate           | Carbohydrate    | 0.4311             | 0.01696        |
| glutamyl-valine               | Amino acid      | 0.42928            | 0.002842       |
| glycyl tyrosine               | Amino acid      | 0.25701            | 0.032624       |
| hexadecylglycerol             | Lipid           | 0.41223            | 0.019619       |
| inosine                       | Nucleoside      | 0.25482            | 5.4E-05        |
| lactulose                     | Carbohydrate    | 0.4687             | 0.003982       |
| monomyristin                  | Lipid           | 0.38332            | 0.012668       |
| myristic acid                 | Lipid           | 0.4143             | 0.000548       |
| palmitic acid                 | Lipid           | 0.47668            | 8.11E-05       |
| pyrophosphate                 | Carbohydrate    | 0.37944            | 0.000799       |
| salicylic acid                | Benzenoids      | 5.2428             | 0.000468       |
| uridine-5-monophosphate       | Nucleoside      | 0.2811             | 0.016056       |



**Fig S3 The top 25 metabolites with the most significant difference between the two extraction methods through the T test**

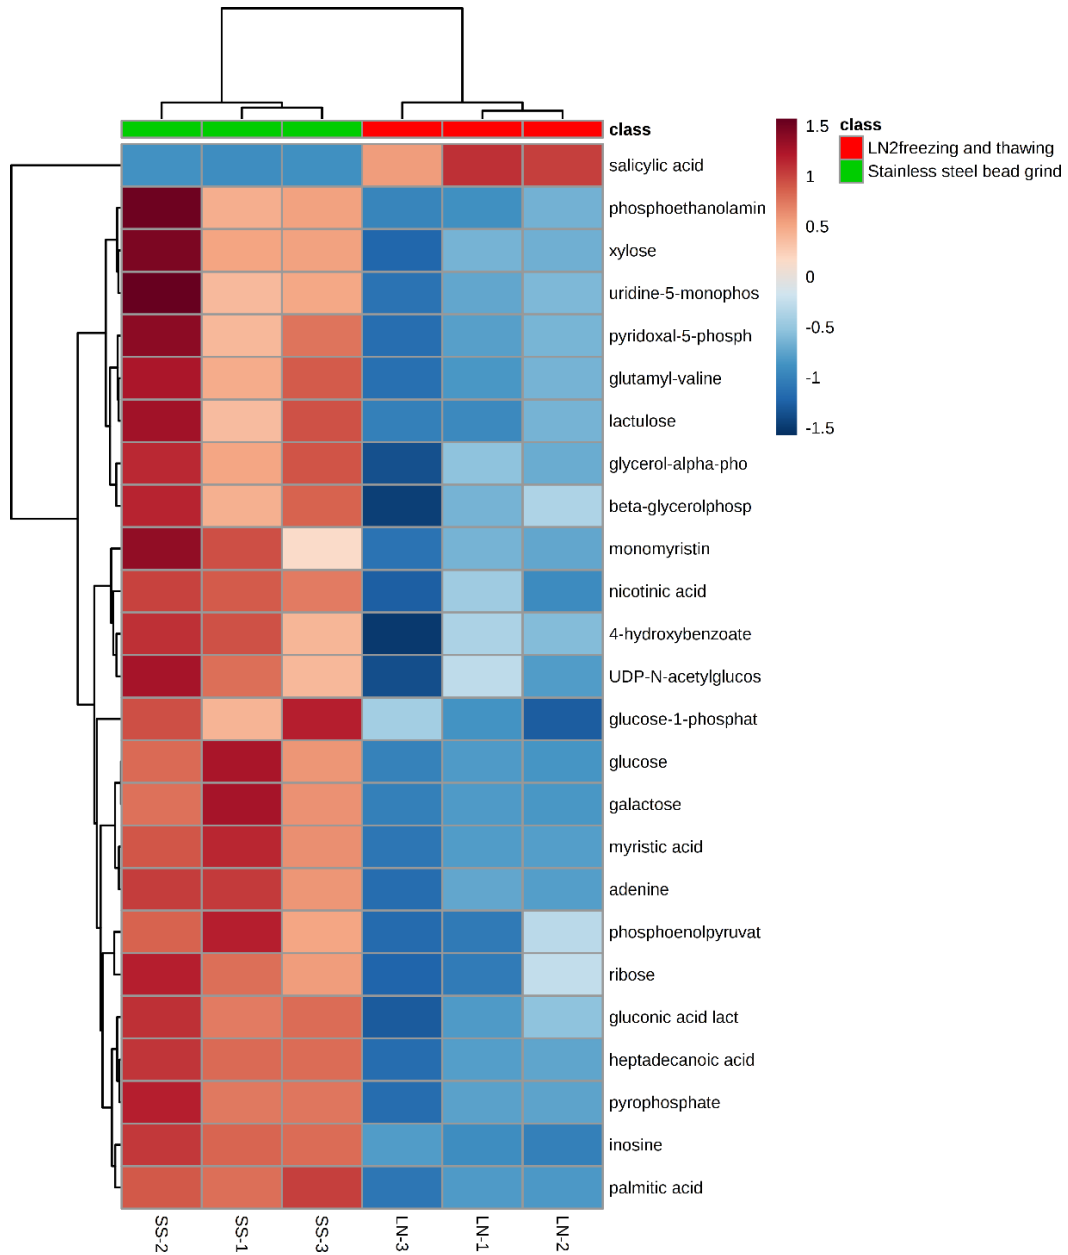

**Table S4 The RSD values for all metabolites**

| Amino acid                | 1      | 2      | 3      | 4      | 5      | 6      | 7      | 8      | 9      | 10     | 11     | 12     |
|---------------------------|--------|--------|--------|--------|--------|--------|--------|--------|--------|--------|--------|--------|
| isoleucine                | 0.1865 | 0.1305 | 0.6586 | 0.0574 | 0.1976 | 0.2245 | 0.1555 | 0.125  | 0.0419 | 0.052  | 0.094  | 0.1697 |
| proline                   | 0.1797 | 0.2854 | 0.4094 | 0.1248 | 0.2992 | 0.3335 | 0.1471 | 0.2907 | 0.2042 | 0.2115 | 0.2324 | 0.7348 |
| glycine                   | 0.2261 | 0.0809 | 0.3611 | 0.0542 | 0.348  | 0.1166 | 0.0483 | 0.0981 | 0.115  | 0.0627 | 0.69   | 0.3431 |
| serine                    | 0.0615 | 0.1357 | 0.3133 | 0.376  | 0.3605 | 0.4329 | 0.0914 | 0.1866 | 0.1945 | 0.2133 | 0.0398 | 0.3392 |
| L-pipecolic acid          | 0.1221 | 0.078  | 0.0927 | 0.1284 | 0.06   | 0.162  | 0.1545 | 0.0891 | 0.0796 | 0.0176 | 0.0547 | 0.1034 |
| threonine                 | 0.1079 | 0.0359 | 0.3933 | 0.1839 | 0.3216 | 0.594  | 0.171  | 0.1073 | 0.1028 | 0.5427 | 0.0394 | 0.3017 |
| beta alanine              | 0.2145 | 0.0723 | 0.2019 | 0.1513 | 0.9498 | 0.2862 | 0.276  | 0.0685 | 0.0913 | 0.0208 | 0.1018 | 0.1486 |
| homoserine                | 0.4659 | 0.3523 | 0.4359 | 0.1804 | 0.2762 | 0.2424 | 0.1123 | 0.0313 | 0.1213 | 0.1827 | 0.0877 | 0.2365 |
| trans-4-hydroxy-L-proline | 0.0652 | 0.066  | 0.0748 | 0.1367 | 0.0062 | 0.023  | 0.142  | 0.0285 | 0.0914 | 0.0786 | 0.1015 | 0.2898 |
| 3-aminoisobutyric acid    | 0.0659 | 0.7077 | 0.9322 | 0.074  | 0.1126 | 0.3488 | 0.1159 | 0.1274 | 0.6609 | 0.0198 | 0.0709 | 0.1282 |
| aspartic acid             | 0.1216 | 0.1066 | 0.6226 | 0.2025 | 0.4724 | 0.5816 | 0.2856 | 0.1136 | 0.1431 | 0.0667 | 0.2259 | 0.3512 |
| methionine                | 0.1195 | 0.0852 | 0.6373 | 0.047  | 0.7687 | 0.166  | 0.1259 | 0.1457 | 0.081  | 0.0249 | 0.377  | 0.2338 |
| 5-Oxoproline              | 0.1293 | 0.025  | 0.5707 | 0.1437 | 0.3509 | 0.5005 | 0.1301 | 0.143  | 0.1314 | 0.0075 | 0.0651 | 0.4299 |
| asparagine                | 0.4475 | 0.3242 | 0.1653 | 0.3188 | 0.3077 | 0.6045 | 0.1249 | 0.1576 | 0.1512 | 0.6114 | 0.0697 | 0.8885 |
| 4-aminobutyric acid       | 0.3861 | 0.1666 | 0.5059 | 0.0968 | 0.3708 | 0.333  | 0.2253 | 0.2831 | 0.2816 | 0.1028 | 0.0863 | 0.3271 |
| L-glutamic acid           | 0.3861 | 0.5922 | 0.5059 | 0.0968 | 0.3708 | 0.333  | 0.704  | 0.4352 | 0.2816 | 0.1028 | 0.6024 | 0.3271 |
| cysteine                  | 0.166  | 0.6859 | 0.6054 | 0.5742 | 0.2124 | 0.6967 | 0.2291 | 0.3062 | 0.0522 | 0.0909 | 0.2763 | 0.2861 |
| creatinine                | 0.0872 | 0.1825 | 0.8125 | 0.311  | 0.7071 | 0.3242 | 0.0491 | 0.2789 | 0.0794 | 0.1247 | 0.1136 | 0.4464 |
| alanine                   | 0.1498 | 0.1121 | 0.6808 | 0.0316 | 0.6878 | 0.439  | 0.1271 | 0.115  | 0.0796 | 0.0441 | 0.1472 | 0.198  |
| ornithine                 | 0.0938 | 0.1013 | 0.4758 | 0.0166 | 0.4462 | 0.3913 | 0.1475 | 0.1163 | 0.1657 | 0.0408 | 0.1832 | 0.2137 |
| 1-Deoxyxypentitol         | 0.1267 | 0.105  | 0.6791 | 0.6991 | 0.6941 | 0.4786 | 0.1931 | 0.1486 | 0.1392 | 0.0095 | 0.1655 | 0.3839 |
| 5-Aminovaleric acid       | 0.1897 | 0.0589 | 0.2875 | 0.142  | 0.6763 | 0.3941 | 0.1706 | 0.0589 | 0.1072 | 0.0393 | 0.0575 | 0.1934 |
| phenylalanine             | 0.1633 | 0.0889 | 0.5848 | 0.0564 | 0.225  | 0.3173 | 0.1795 | 0.0855 | 0.0884 | 0.0393 | 0.114  | 0.1868 |
| alpha-aminoadipic acid    | 0.0804 | 0.2114 | 0.3783 | 0.0414 | 0.4122 | 0.4664 | 0.1702 | 0.0879 | 0.1202 | 0.0293 | 0.1106 | 0.3035 |
| glutamine                 | 0.3031 | 0.1741 | 0.4769 | 0.12   | 0.5604 | 0.3941 | 0.3208 | 0.1155 | 0.3764 | 0.0575 | 0.1483 | 0.3297 |
| citrulline                | 0.1412 | 0.11   | 0.5811 | 0.0707 | 0.7161 | 0.4305 | 0.1237 | 0.0904 | 0.0958 | 0.0292 | 0.2043 | 0.1851 |
| methionine sulfoxide      | 0.1911 | 0.2221 | 0.093  | 0.1539 | 0.4076 | 0.2797 | 0.1115 | 0.382  | 0.2359 | 0.0914 | 0.0756 | 0.1725 |
| histidine                 | 0.4201 | 0.096  | 0.6967 | 0.0107 | 0.6073 | 0.5023 | 0.269  | 0.242  | 0.0484 | 0.0045 | 0.29   | 0.2646 |
| lysine                    | 0.0445 | 0.1114 | 0.5561 | 0.0148 | 0.358  | 0.3459 | 0.1977 | 0.6163 | 0.0896 | 0.0166 | 0.3159 | 0.2378 |
| tyrosine                  | 0.1932 | 0.1107 | 0.6617 | 0.0751 | 0.3759 | 0.3821 | 0.1589 | 0.0679 | 0.0447 | 0.0698 | 0.0869 | 0.2137 |
| 2,6-diaminopimelic acid   | 0.3093 | 0.0803 | 0.141  | 0.2472 | 0.5881 | 0.6143 | 0.3048 | 0.1393 | 0.1277 | 0.0113 | 0.1032 | 0.3396 |
| glycyl-proline            | 0.1115 | 0.0786 | 0.6225 | 0.0577 | 0.7784 | 0.2915 | 0.1452 | 0.09   | 0.4958 | 0.0222 | 0.2788 | 0.17   |
| N-acetylornithine         | 0.1904 | 0.2281 | 0.6711 | 0.0284 | 0.707  | 0.3661 | 0.1446 | 0.034  | 0.1724 | 0.0678 | 0.4145 | 0.2979 |
| cysteine-glycine          | 0.1702 | 0.5833 | 0.3919 | 0.3338 | 0.2257 | 0.2385 | 0.1505 | 0.3966 | 0.1751 | 0.1058 | 0.158  | 0.4881 |
| glutamyl-valine           | 0.1317 | 0.1703 | 0.2007 | 0.1144 | 0.1807 | 0.3659 | 0.156  | 0.1039 | 0.158  | 0.0571 | 0.2905 | 0.4512 |
| glutathione               | 0.6692 | 0.7799 | 0.1584 | 0.575  | 0.5182 | 0.9756 | 0.2599 | 0.0461 | 0.1377 | 0.03   | 0.3849 | 0.4087 |
| homocystine               | 0.173  | 0.2711 | 0.1522 | 0.137  | 0.0574 | 0.1874 | 0.1534 | 0.063  | 0.054  | 0.0362 | 0.0817 | 0.3041 |
| xanthosine                | 0.3471 | 0.4953 | 0.1082 | 0.2054 | 0.6394 | 0.0702 | 0.4523 | 0.3061 | 0.2985 | 0.7592 | 0.2084 | 0.497  |

| Carbohydrate               | 1      | 2      | 3      | 4      | 5      | 6      | 7      | 8      | 9      | 10     | 11     | 12     |
|----------------------------|--------|--------|--------|--------|--------|--------|--------|--------|--------|--------|--------|--------|
| glyceric acid              | 0.1119 | 0.0978 | 0.165  | 0.5209 | 0.2585 | 0.2971 | 0.0918 | 0.0706 | 0.1844 | 0.0477 | 0.0286 | 0.292  |
| 2,3-Dihydroxybutanoic acid | 0.4486 | 0.8473 | 0.1952 | 0.4233 | 0.4325 | 0.1371 | 0.4212 | 0.4706 | 0.7596 | 0.3977 | 0.6036 | 0.0071 |
| erythrose                  | 0.0766 | 0.0458 | 0.1781 | 0.1604 | 0.0497 | 0.0456 | 0.057  | 0.0871 | 0.0465 | 0.0405 | 0.0748 | 0.1094 |
| threitol                   | 0.0518 | 0.0237 | 0.4144 | 0.1134 | 0.3189 | 0.572  | 0.5821 | 0.1464 | 0.2318 | 0.007  | 0.3273 | 0.8373 |
| threonic acid              | 0.1443 | 0.1499 | 0.1387 | 0.4755 | 0.1166 | 0.1808 | 0.23   | 0.2016 | 0.0257 | 0.073  | 0.4739 | 0.2989 |
| Erythronic acid            | 0.0627 | 0.0787 | 0.4678 | 0.0732 | 0.2607 | 0.1794 | 0.0934 | 0.1017 | 0.1582 | 0.0298 | 0.2467 | 0.4992 |
| glutamic acid              | 0.0665 | 0.5197 | 0.7237 | 0.0563 | 0.5563 | 0.6787 | 0.1771 | 0.1537 | 0.1388 | 0.0133 | 0.1778 | 0.4027 |
| tartaric acid              | 0.6248 | 0.2205 | 0.225  | 0.1331 | 0.1718 | 0.5008 | 0.0924 | 0.1637 | 0.139  | 0.3407 | 0.5752 | 0.4128 |
| D-Lyxose                   | 0.0478 | 0.0572 | 0.6445 | 0.0646 | 0.4108 | 0.3545 | 0.1128 | 0.0878 | 0.1745 | 0.0454 | 0.1425 | 0.6658 |
| xylose                     | 0.0671 | 0.1045 | 0.4466 | 0.0876 | 0.1833 | 0.1433 | 0.1099 | 0.1092 | 0.1282 | 0.0114 | 0.2052 | 0.2031 |
| pyrophosphate              | 0.2958 | 0.0341 | 0.7341 | 0.176  | 0.4501 | 0.3601 | 0.1719 | 0.0706 | 0.1363 | 0.0224 | 0.3062 | 0.0646 |
| xylulose                   | 0.0954 | 0.133  | 0.6506 | 0.641  | 0.1189 | 0.1664 | 0.6216 | 0.7363 | 0.1889 | 0.6501 | 0.2299 | 0.8247 |
| ribose                     | 0.0262 | 0.0921 | 0.1948 | 0.1466 | 0.1547 | 0.505  | 0.0775 | 0.0358 | 0.088  | 0.0629 | 0.1154 | 0.1862 |
| pentitol                   | 0.0448 | 0.0527 | 0.3952 | 0.1427 | 0.1701 | 0.0699 | 0.1861 | 0.1082 | 0.1824 | 0.0383 | 0.2177 | 0.1405 |
| arabitol                   | 0.0062 | 0.6567 | 0.0866 | 0.6745 | 0.2057 | 0.1395 | 0.0393 | 0.0287 | 0.1037 | 0.019  | 0.1131 | 0.3994 |
| 6-deoxyglucose             | 0.2211 | 0.2089 | 0.434  | 0.6497 | 0.4306 | 0.1163 | 0.0368 | 0.3797 | 0.1077 | 0.0047 | 0.1153 | 0.105  |
| fucose                     | 0.1915 | 0.2035 | 0.0826 | 0.3409 | 0.2276 | 0.0909 | 0.5682 | 0.4523 | 0.5446 | 0.5189 | 0.6436 | 0.6701 |
| glucose-1-phosphate        | 0.0362 | 0.093  | 0.5263 | 0.033  | 0.4448 | 0.2288 | 0.0818 | 0.0539 | 0.0929 | 0.0139 | 0.1688 | 0.4429 |
| pentonic acid              | 0.0545 | 0.0455 | 0.4791 | 0.2816 | 0.6345 | 0.1965 | 0.1743 | 0.0887 | 0.0706 | 0.0829 | 0.2082 | 0.3272 |
| ribonic acid               | 0.0931 | 0.0941 | 0.4854 | 0.535  | 0.3215 | 0.1512 | 0.224  | 0.378  | 0.0862 | 0.328  | 0.1913 | 0.1772 |
| 3-phosphoglycerate         | 0.191  | 0.2275 | 0.709  | 0.1196 | 0.6093 | 0.3303 | 0.1173 | 0.1369 | 0.0663 | 0.0505 | 0.6609 | 0.396  |
| 1,5-anhydroglucitol        | 0.0896 | 0.1247 | 0.7391 | 0.6408 | 0.5021 | 0.4612 | 0.1711 | 0.046  | 0.1322 | 0.0345 | 0.1416 | 0.1957 |
| pinitol                    | 0.6069 | 0.0985 | 0.3999 | 0.1456 | 0.9247 | 0.3851 | 0.5198 | 0.1714 | 0.5141 | 0.998  | 0.0866 | 0.2011 |
| fructose                   | 0.2291 | 0.1848 | 0.1582 | 0.3767 | 0.3943 | 0.1359 | 0.2077 | 0.1633 | 0.0501 | 0.1453 | 0.3031 | 0.1661 |
| tagatose                   | 0.1862 | 0.4253 | 0.2676 | 0.4236 | 0.3861 | 0.69   | 0.2116 | 0.1614 | 0.0852 | 0.6772 | 0.285  | 0.1553 |
| gluconic acid lactone      | 0.0862 | 0.0812 | 0.2021 | 0.1129 | 0.1752 | 0.1264 | 0.114  | 0.0359 | 0.1324 | 0.047  | 0.0582 | 0.1263 |
| galactose                  | 0.177  | 0.1416 | 0.4655 | 0.0992 | 0.4198 | 0.1782 | 0.0478 | 0.0782 | 0.1399 | 0.1226 | 0.2905 | 0.1841 |
| glucose                    | 0.1744 | 0.1246 | 0.3722 | 0.1267 | 0.3508 | 0.1991 | 0.0471 | 0.0805 | 0.1486 | 0.5144 | 0.2762 | 0.1553 |
| sorbitol                   | 0.2704 | 0.8656 | 0.9815 | 0.4521 | 0.2148 | 0.0571 | 0.1925 | 0.1274 | 0.0893 | 0.0142 | 0.0636 | 0.1877 |
| galactitol                 | 0.2548 | 0.1132 | 0.1806 | 0.2922 | 0.7784 | 0.3216 | 0.0892 | 0.5132 | 0.1051 | 0.2436 | 0.6099 | 0.239  |
| hexose                     | 0.1775 | 0.1368 | 0.6112 | 0.1386 | 0.2204 | 0.4843 | 0.0639 | 0.0947 | 0.2052 | 0.0526 | 0.3416 | 0.4924 |
| pantothenic acid           | 0.1686 | 0.0799 | 0.4221 | 0.1727 | 0.6112 | 0.4472 | 0.1723 | 0.0791 | 0.0929 | 0.0285 | 0.0561 | 0.1824 |
| hexitol                    | 0.5785 | 0.4746 | 0.7886 | 0.4907 | 0.2768 | 0.365  | 0.6875 | 0.6937 | 0.5518 | 0.0277 | 0.7188 | 0.721  |
| myo-inositol               | 0.2028 | 0.1356 | 0.2971 | 0.1005 | 0.2043 | 0.2721 | 0.1342 | 0.086  | 0.035  | 0.0779 | 0.2467 | 0.2409 |
| ribose-5-phosphate         | 0.5894 | 0.2381 | 0.4015 | 0.2099 | 0.4302 | 0.2344 | 0.3641 | 0.3992 | 0.1694 | 0.3166 | 0.2232 | 0.7798 |
| N-acetyl-D-mannosamine     | 0.134  | 0.0842 | 0.1497 | 0.1756 | 0.3356 | 0.3554 | 0.2299 | 0.0417 | 0.0462 | 0.0831 | 0.1905 | 0.2787 |
| fructose-1-phosphate       | 0.1905 | 0.2088 | 0.604  | 0.3993 | 0.3275 | 0.3287 | 0.141  | 0.0627 | 0.0979 | 0.0493 | 0.141  | 0.2514 |
| fructose-6-phosphate       | 0.1401 | 0.0127 | 0.5247 | 0.0123 | 0.4613 | 0.3511 | 0.5379 | 0.3815 | 0.3096 | 0.0463 | 0.1393 | 0.2198 |
| glucose-6-phosphate        | 0.1115 | 0.2003 | 0.2598 | 0.0988 | 0.0636 | 0.1589 | 0.3463 | 0.1393 | 0.1072 | 0.1558 | 0.2462 | 0.2098 |
| mannose-6-phosphate        | 0.1267 | 0.2218 | 0.5808 | 0.1073 | 0.1341 | 0.3126 | 0.1346 | 0.2351 | 0.2313 | 0.1428 | 0.8284 | 0.5277 |
| galactose-6-phosphate      | 0.0861 | 0.0418 | 0.279  | 0.0164 | 0.3327 | 0.5226 | 0.2404 | 0.2237 | 0.3585 | 0.6623 | 0.8838 | 0.5031 |
| sucrose                    | 0.1763 | 0.1197 | 0.6192 | 0.3578 | 0.6842 | 0.5508 | 0.1629 | 0.5082 | 0.2268 | 0.3317 | 0.3023 | 0.3689 |
| lactulose                  | 0.0638 | 0.2626 | 0.3032 | 0.164  | 0.2623 | 0.0448 | 0.1026 | 0.1166 | 0.129  | 0.0628 | 0.1888 | 0.6087 |
| cellobiose                 | 0.3575 | 0.8701 | 0.8094 | 0.2076 | 0.6704 | 0.1948 | 0.1208 | 0.2301 | 0.0893 | 0.0561 | 0.335  | 0.255  |
| trehalose                  | 0.3049 | 0.1468 | 0.5731 | 0.1405 | 0.3731 | 0.3682 | 0.4287 | 0.3272 | 0.2713 | 0.1547 | 0.0821 | 0.185  |
| maltose                    | 0.3681 | 0.9233 | 0.2438 | 0.3095 | 0.492  | 0.3083 | 0.1809 | 0.2142 | 0.0812 | 0.041  | 0.3437 | 0.2648 |
| galactinol                 | 0.2645 | 0.032  | 0.6778 | 0.4347 | 0.1063 | 0.4574 | 0.1086 | 0.1251 | 0.0565 | 0.0399 | 0.3748 | 0.3612 |

| Lipid                         | 1      | 2      | 3      | 4      | 5      | 6      | 7      | 8      | 9      | 10     | 11     | 12     |
|-------------------------------|--------|--------|--------|--------|--------|--------|--------|--------|--------|--------|--------|--------|
| itaconic acid                 | 0.066  | 0.3151 | 0.0663 | 0.0634 | 0.0171 | 0.0746 | 0.0812 | 0.1694 | 0.0278 | 0.0558 | 0.2022 | 0.3519 |
| 2,5-Dihydroxypyrazine         | 0.597  | 0.5854 | 0.5084 | 0.4017 | 0.1572 | 0.7721 | 0.8636 | 0.7249 | 0.1746 | 0.0139 | 0.2462 | 0.2712 |
| pelargonic acid               | 0.3151 | 0.1377 | 0.0703 | 0.1937 | 0.304  | 0.2224 | 0.2023 | 0.1883 | 0.1242 | 0.0137 | 0.0868 | 0.4338 |
| capric acid                   | 0.0477 | 0.0647 | 0.0794 | 0.1376 | 0.0064 | 0.0239 | 0.0501 | 0.0183 | 0.0707 | 0.0807 | 0.0118 | 0.1103 |
| dodecanol                     | 0.166  | 0.068  | 0.1058 | 0.1429 | 0.2607 | 0.4639 | 0.0564 | 0.3148 | 0.0631 | 0.0198 | 0.5101 | 0.293  |
| Beta-Glutamic acid            | 0.1845 | 0.0719 | 0.5414 | 0.1702 | 0.7701 | 0.4418 | 0.1935 | 0.1197 | 0.0955 | 0.0275 | 0.1425 | 0.3511 |
| lauric acid                   | 0.2546 | 0.1364 | 0.4971 | 0.1524 | 0.2329 | 0.3775 | 0.0379 | 0.2871 | 0.0754 | 0.0954 | 0.1641 | 0.5255 |
| 2,4-hexadienedioic acid       | 0.0346 | 0.1247 | 0.479  | 0.0542 | 0.2833 | 0.1737 | 0.1514 | 0.1685 | 0.0905 | 0.0541 | 0.0854 | 0.6574 |
| diglycerol                    | 0.0452 | 0.0216 | 0.6813 | 0.0811 | 0.7015 | 0.0437 | 0.055  | 0.0319 | 0.1369 | 0.0638 | 0.0627 | 0.1114 |
| glycerol-alpha-phosphate      | 0.0422 | 0.0262 | 0.6607 | 0.0857 | 0.6965 | 0.6089 | 0.0603 | 0.5509 | 0.1439 | 0.6651 | 0.0569 | 0.1225 |
| myristic acid                 | 0.1235 | 0.1257 | 0.3629 | 0.0968 | 0.3898 | 0.2326 | 0.1071 | 0.0693 | 0.0758 | 0.0976 | 0.1486 | 0.3492 |
| tyramine                      | 0.1082 | 0.042  | 0.358  | 0.0615 | 0.1217 | 0.3033 | 0.0407 | 0.2078 | 0.5837 | 0.5143 | 0.6039 | 0.2322 |
| pentadecanoic acid            | 0.1178 | 0.0891 | 0.0925 | 0.0165 | 0.3259 | 0.064  | 0.129  | 0.0599 | 0.0865 | 0.0936 | 0.1241 | 0.2593 |
| isohexonic acid               | 0.1678 | 0.6403 | 0.096  | 0.0428 | 0.0997 | 0.2646 | 0.1887 | 0.097  | 0.1488 | 0.0419 | 0.3261 | 0.1791 |
| beta-hydroxymyristic acid     | 0.1152 | 0.1813 | 0.595  | 0.1776 | 0.7264 | 0.3868 | 0.1469 | 0.7421 | 0.0824 | 0.1015 | 0.5091 | 0.3352 |
| palmitoleic acid              | 0.1284 | 0.054  | 0.0943 | 0.4619 | 0.3414 | 0.2729 | 0.1687 | 0.0947 | 0.2697 | 0.1322 | 0.1892 | 0.1289 |
| palmitic acid                 | 0.1287 | 0.0872 | 0.1605 | 0.2023 | 0.3509 | 0.166  | 0.0751 | 0.0275 | 0.0311 | 0.1213 | 0.1034 | 0.3463 |
| heptadecanoic acid            | 0.1307 | 0.0668 | 0.1405 | 0.0801 | 0.4257 | 0.0482 | 0.1009 | 0.0331 | 0.0868 | 0.1178 | 0.111  | 0.233  |
| octadecanol                   | 0.1297 | 0.0519 | 0.0808 | 0.0604 | 0.0587 | 0.1914 | 0.0303 | 0.0713 | 0.0504 | 0.04   | 0.089  | 0.133  |
| 2,3-Diphosphoglycerin         | 0.3553 | 0.5593 | 0.7576 | 0.6989 | 0.0851 | 0.165  | 0.6741 | 0.1841 | 0.4997 | 0.0853 | 0.5092 | 0.5415 |
| linoleic acid                 | 0.1524 | 0.0578 | 0.1525 | 0.1038 | 0.1478 | 0.2861 | 0.1322 | 0.0822 | 0.4841 | 0.0171 | 0.6945 | 0.0847 |
| oleic acid                    | 0.1639 | 0.388  | 0.708  | 0.0949 | 0.1143 | 0.3356 | 0.1165 | 0.0543 | 0.5575 | 0.0465 | 0.447  | 0.5054 |
| stearic acid                  | 0.1783 | 0.0452 | 0.1596 | 0.3587 | 0.248  | 0.1934 | 0.0564 | 0.3879 | 0.1078 | 0.1438 | 0.0451 | 0.4068 |
| Galactosylglycerol            | 0.2281 | 0.7526 | 0.9309 | 0.0594 | 0.3741 | 0.534  | 0.1695 | 0.0777 | 0.0905 | 0.0246 | 0.0758 | 0.1739 |
| nonadecanoic acid             | 0.1004 | 0.1102 | 0.1142 | 0.4031 | 0.2319 | 0.2408 | 0.1438 | 0.0669 | 0.1437 | 0.1843 | 0.1093 | 0.4771 |
| monomyristin                  | 0.1046 | 0.0199 | 0.3788 | 0.3729 | 0.3955 | 0.2569 | 0.1996 | 0.1879 | 0.0252 | 0.0183 | 0.1273 | 0.4093 |
| dehydroabiatic acid           | 0.1145 | 0.0836 | 0.5055 | 0.124  | 0.206  | 0.2829 | 0.8843 | 0.0623 | 0.282  | 0.0409 | 0.0509 | 0.4244 |
| oleamide                      | 0.1557 | 0.0959 | 0.1661 | 0.2925 | 0.7036 | 0.3503 | 0.2011 | 0.1864 | 0.386  | 0.2269 | 0.2177 | 0.1758 |
| cis-gondoic acid              | 0.2315 | 0.0735 | 0.6475 | 0.3566 | 0.2972 | 0.8432 | 0.2018 | 0.2317 | 0.4346 | 0.1437 | 0.0237 | 0.4533 |
| arachidic acid                | 0.1514 | 0.0472 | 0.1019 | 0.1669 | 0.166  | 0.053  | 0.0461 | 0.2467 | 0.1101 | 0.1388 | 0.085  | 0.3585 |
| abiatic acid                  | 0.4486 | 0.3568 | 0.498  | 0.3515 | 0.0212 | 0.8885 | 0.1603 | 0.2562 | 0.3692 | 0.1579 | 0.5003 | 0.7279 |
| hexadecylglycerol             | 0.2349 | 0.1922 | 0.2873 | 0.4004 | 0.7151 | 0.7721 | 0.4753 | 0.1013 | 0.3305 | 0.1513 | 0.1208 | 0.2454 |
| 2-monopalmitin                | 0.1141 | 0.1747 | 0.1985 | 0.2089 | 0.5282 | 0.1909 | 0.249  | 0.1679 | 0.1195 | 0.0659 | 0.0933 | 0.3106 |
| 1-monopalmitin                | 0.1892 | 0.1125 | 0.1299 | 0.0231 | 0.3614 | 0.2486 | 0.1942 | 0.1275 | 0.1562 | 0.068  | 0.0964 | 0.2563 |
| 1-monoheptadecanoyl glyceride | 0.1528 | 0.2346 | 0.6846 | 0.5123 | 0.5333 | 0.2746 | 0.2891 | 0.1848 | 0.048  | 0.4674 | 0.1455 | 0.4062 |
| lactobionic acid              | 0.0958 | 0.5655 | 0.4622 | 0.9821 | 0.4228 | 0.4336 | 0.1724 | 0.8957 | 0.399  | 0.5585 | 0.0602 | 0.3808 |
| squalene                      | 0.339  | 0.4326 | 0.2979 | 0.0991 | 0.4739 | 0.1989 | 0.1866 | 0.0725 | 0.1337 | 0.1438 | 0.0565 | 0.233  |
| lignoceric acid               | 0.1501 | 0.2568 | 0.143  | 0.0413 | 0.1065 | 0.3951 | 0.2617 | 0.8145 | 0.127  | 0.1165 | 0.2492 | 0.4892 |
| cholesterol                   | 0.103  | 0.1371 | 0.1474 | 0.1657 | 0.131  | 0.2475 | 0.1133 | 0.2881 | 0.0124 | 0.0841 | 0.4559 | 0.0455 |

| Nucleotide                      | 1      | 2      | 3      | 4      | 5      | 6      | 7      | 8      | 9      | 10     | 11     | 12     |
|---------------------------------|--------|--------|--------|--------|--------|--------|--------|--------|--------|--------|--------|--------|
| UDP-N-acetylglucosamine         | 0.0237 | 0.2691 | 0.4501 | 0.2229 | 0.334  | 0.5287 | 0.2253 | 0.0985 | 0.1451 | 0.0272 | 0.5337 | 0.4428 |
| cytidine-5-monophosphate        | 0.0565 | 0.1259 | 0.7002 | 0.1789 | 0.6344 | 0.3562 | 0.0805 | 0.0734 | 0.1086 | 0.0308 | 0.1714 | 0.2792 |
| uridine                         | 0.2733 | 0.0691 | 0.5184 | 0.2947 | 0.5969 | 0.5282 | 0.1361 | 0.0246 | 0.3788 | 0.1085 | 0.1102 | 0.4038 |
| inosine                         | 0.4829 | 0.1092 | 0.3712 | 0.0735 | 0.3988 | 0.6927 | 0.1361 | 0.0465 | 0.2783 | 0.0322 | 0.1385 | 0.2367 |
| adenosine                       | 0.1853 | 0.1666 | 0.7345 | 0.3238 | 0.6901 | 0.2867 | 0.074  | 0.0346 | 0.2705 | 0.1499 | 0.2183 | 0.1847 |
| glycyl tyrosine                 | 0.3436 | 0.1638 | 0.1068 | 0.6307 | 0.4601 | 0.2545 | 0.2357 | 0.142  | 0.2453 | 0.0375 | 0.1907 | 0.6427 |
| 5'-deoxy-5'-methylthioadenosine | 0.1191 | 0.1596 | 0.942  | 0.2473 | 0.386  | 0.231  | 0.1601 | 0.5196 | 0.3045 | 0.0242 | 0.506  | 0.3331 |
| uridine-5-monophosphate         | 0.1384 | 0.1695 | 0.7832 | 0.0822 | 0.5603 | 0.3275 | 0.3353 | 0.2357 | 0.4452 | 0.2566 | 0.488  | 0.6512 |
| inosine-5'-monophosphate        | 0.0561 | 0.2652 | 0.1046 | 0.4669 | 0.2763 | 0.4277 | 0.1615 | 0.1601 | 0.2647 | 0.0285 | 0.3766 | 0.3116 |
| adenosine-5-monophosphate       | 0.0904 | 0.0644 | 0.6976 | 0.0791 | 0.5901 | 0.2931 | 0.1333 | 0.0891 | 0.0694 | 0.0311 | 0.2614 | 0.2933 |

| Other                       | 1      | 2      | 3      | 4      | 5      | 6      | 7      | 8      | 9      | 10     | 11     | 12     |
|-----------------------------|--------|--------|--------|--------|--------|--------|--------|--------|--------|--------|--------|--------|
| 1,2-Dihydroxycyclohexane    | 0.0266 | 0.1449 | 0.1244 | 0.2156 | 0.0063 | 0.0722 | 0.1015 | 0.3245 | 0.263  | 0.1886 | 0.3828 | 0.1186 |
| nicotinic acid              | 0.193  | 0.2271 | 0.7632 | 0.1946 | 0.4693 | 0.0315 | 0.1291 | 0.0267 | 0.1752 | 0.0523 | 0.1551 | 0.2754 |
| maleic acid                 | 0.3425 | 0.2061 | 0.0373 | 0.1177 | 0.1971 | 0.1432 | 0.71   | 0.6553 | 0.4521 | 0.1121 | 0.7395 | 0.394  |
| succinic acid               | 0.0864 | 0.0277 | 0.3477 | 0.176  | 0.3779 | 0.1931 | 0.0969 | 0.0216 | 0.0761 | 0.1182 | 0.047  | 0.0559 |
| 2,3-dihydropyridine         | 0.7028 | 0.0272 | 0.043  | 0.7008 | 0.0324 | 0.7002 | 0.2289 | 0.449  | 0.047  | 0.0033 | 0.6936 | 0.4605 |
| o-toluic acid               | 0.0184 | 0.6695 | 0.7414 | 0.5848 | 0.1209 | 0.171  | 0.627  | 0.0853 | 0.4804 | 0.4979 | 0.4443 | 0.7101 |
| uracil                      | 0.204  | 0.0625 | 0.4581 | 0.1518 | 0.4582 | 0.5277 | 0.2953 | 0.1045 | 0.1388 | 0.0372 | 0.0615 | 0.2009 |
| fumaric acid                | 0.4806 | 0.102  | 0.7192 | 0.0872 | 0.6182 | 0.7025 | 0.3516 | 0.1101 | 0.1756 | 0.0371 | 0.2566 | 0.2828 |
| citraconic acid             | 0.6715 | 0.2176 | 0.1618 | 0.0119 | 0.1137 | 0.2033 | 0.2618 | 0.2262 | 0.043  | 0.0406 | 0.3366 | 0.2272 |
| Erythronic acid g-lactone   | 0.06   | 0.1336 | 0.0635 | 0.0606 | 0.0569 | 0.183  | 0.0405 | 0.0891 | 0.0722 | 0.061  | 0.0504 | 0.1017 |
| thymine                     | 0.8208 | 0.7291 | 0.5179 | 0.0085 | 0.8338 | 0.4851 | 0.2854 | 0.0468 | 0.2658 | 0.0169 | 0.0524 | 0.5488 |
| glutaric acid               | 0.3971 | 0.2194 | 0.7033 | 0.542  | 0.5032 | 0.2001 | 0.7214 | 0.2318 | 0.7823 | 0.3093 | 0.0348 | 0.7148 |
| dihydroxymalonic acid       | 0.002  | 0.0438 | 0.6762 | 0.6882 | 0.0394 | 0.0355 | 0.0187 | 0.6859 | 0.0385 | 0.4411 | 0.0123 | 0.6605 |
| malate                      | 0.0859 | 0.0448 | 0.3424 | 0.151  | 0.1871 | 0.3187 | 0.2535 | 0.0606 | 0.0274 | 0.0728 | 0.3464 | 0.3989 |
| malic acid                  | 0.0518 | 0.0237 | 0.4144 | 0.1134 | 0.2621 | 0.7462 | 0.6612 | 0.1464 | 0.4613 | 0.272  | 0.3273 | 0.3093 |
| nicotinamide                | 0.1362 | 0.0944 | 0.605  | 0.0978 | 0.5476 | 0.4189 | 0.165  | 0.0987 | 0.189  | 0.0222 | 0.267  | 0.3663 |
| 5,6-dihydrouracil           | 0.11   | 0.3159 | 0.3793 | 0.1273 | 0.861  | 0.5952 | 0.2856 | 0.1641 | 0.2601 | 0.0149 | 0.3329 | 0.3113 |
| salicylic acid              | 0.1564 | 0.2865 | 0.3811 | 0.0316 | 0.4934 | 0.352  | 0.1089 | 0.0357 | 0.1812 | 0.0619 | 0.1312 | 0.2586 |
| cytosin                     | 0.4906 | 0.2023 | 0.2488 | 0.0875 | 0.4343 | 0.6992 | 0.3045 | 0.0662 | 0.4046 | 0.1186 | 0.6357 | 0.6454 |
| 3-phenyllactic acid         | 0.0577 | 0.0809 | 0.4627 | 0.0637 | 0.2431 | 0.166  | 0.0937 | 0.7141 | 0.1523 | 0.0366 | 0.1921 | 0.2891 |
| phosphoenolpyruvate         | 0.1735 | 0.1267 | 0.638  | 0.085  | 0.028  | 0.5018 | 0.1965 | 0.0739 | 0.0782 | 0.0391 | 0.3715 | 0.3868 |
| hexadecane                  | 0.1532 | 0.367  | 0.1579 | 0.1503 | 0.2532 | 0.503  | 0.0036 | 0.172  | 0.2601 | 0.3802 | 0.2835 | 0.1768 |
| 4-hydroxybenzoate           | 0.4039 | 0.184  | 0.2875 | 0.0977 | 0.2678 | 0.086  | 0.0891 | 0.0415 | 0.0865 | 0.1276 | 0.093  | 0.2542 |
| xylonolactone               | 0.0478 | 0.0572 | 0.6445 | 0.0646 | 0.4233 | 0.3545 | 0.3528 | 0.6345 | 0.1745 | 0.0454 | 0.2426 | 0.785  |
| 1,3-diaminopropane          | 0.0749 | 0.0736 | 0.1541 | 0.4529 | 0.056  | 0.0884 | 0.2406 | 0.2196 | 0.1206 | 0.0235 | 0.1857 | 0.2031 |
| phthalic acid               | 0.0776 | 0.0551 | 0.1093 | 0.1636 | 0.2198 | 0.0553 | 0.1956 | 0.0994 | 0.0751 | 0.0039 | 0.0166 | 0.3958 |
| levoglucosan                | 0.0081 | 0.0783 | 0.1002 | 0.0761 | 0.2043 | 0.1033 | 0.0331 | 0.0136 | 0.1111 | 0.0191 | 0.1087 | 0.6706 |
| beta-glycerolphosphate      | 0.1198 | 0.0657 | 0.5736 | 0.0795 | 0.6585 | 0.1674 | 0.1124 | 0.0502 | 0.2092 | 0.0194 | 0.0937 | 0.1051 |
| putrescine                  | 0.1713 | 0.1848 | 0.7709 | 0.1086 | 0.7994 | 0.3903 | 0.1912 | 0.0967 | 0.151  | 0.0511 | 0.3099 | 0.216  |
| N-acetylputrescine          | 0.2462 | 0.0864 | 0.6907 | 0.1389 | 0.7058 | 0.3176 | 0.1699 | 0.1171 | 0.1232 | 0.0297 | 0.0988 | 0.2462 |
| phosphoethanolamine         | 0.0625 | 0.1239 | 0.6709 | 0.0359 | 0.7056 | 0.0662 | 0.055  | 0.1172 | 0.0646 | 0.0994 | 0.0779 | 0.1771 |
| terephthalic acid           | 0.4331 | 0.0837 | 0.6389 | 0.0781 | 0.1136 | 0.1274 | 0.6762 | 0.0344 | 0.2461 | 0.0409 | 0.0513 | 0.094  |
| hypoxanthine                | 0.1962 | 0.0358 | 0.4946 | 0.6835 | 0.2447 | 0.4926 | 0.2201 | 0.0742 | 0.0991 | 0.0747 | 0.082  | 0.1719 |
| citric acid                 | 0.0294 | 0.0416 | 0.0969 | 0.0328 | 0.3337 | 0.3375 | 0.4267 | 0.2305 | 0.0861 | 0.0189 | 0.0269 | 0.2248 |
| dehydroascorbic acid        | 0.1406 | 0.0818 | 0.4926 | 0.0021 | 0.1999 | 0.3508 | 0.1571 | 0.0652 | 0.0797 | 0.0736 | 0.1059 | 0.2366 |
| hippuric acid               | 0.3322 | 0.1977 | 0.3076 | 0.1547 | 0.2292 | 0.3225 | 0.2394 | 0.7093 | 0.4276 | 0.2921 | 0.5751 | 0.2289 |
| adenine                     | 0.2084 | 0.1138 | 0.6982 | 0.0664 | 0.6247 | 0.923  | 0.0891 | 0.0545 | 0.1757 | 0.0415 | 0.3463 | 0.3037 |
| p-Hydroxyphenyl lactic acid | 0.1088 | 0.0502 | 0.6962 | 0.1032 | 0.0939 | 0.3119 | 0.3096 | 0.0821 | 0.1256 | 0.0821 | 0.1371 | 0.1233 |
| isopentadecanoic acid       | 0.53   | 0.4641 | 0.0521 | 0.6664 | 0.3226 | 0.7788 | 0.269  | 0.9761 | 0.0312 | 0.6334 | 0.29   | 0.2647 |
| xanthine                    | 0.1533 | 0.092  | 0.3362 | 0.125  | 0.4723 | 0.5104 | 0.2493 | 0.1788 | 0.1849 | 0.0168 | 0.0637 | 0.4937 |
| conduritol-beta-expoide     | 0.2371 | 0.1057 | 0.5456 | 0.0919 | 0.5417 | 0.4648 | 0.1314 | 0.087  | 0.0798 | 0.0349 | 0.2698 | 0.2564 |
| uric acid                   | 0.8037 | 0.3345 | 0.4727 | 0.2158 | 0.2104 | 0.6606 | 0.0706 | 0.2105 | 0.1137 | 0.0274 | 0.1762 | 0.5881 |
| guanine                     | 0.0808 | 0.4553 | 0.2494 | 0.0053 | 0.5056 | 0.9187 | 0.2527 | 0.4911 | 0.1793 | 0.1065 | 0.0973 | 0.135  |
| noradrenaline               | 0.2312 | 0.1046 | 0.5785 | 0.038  | 0.3846 | 0.4698 | 0.1571 | 0.0949 | 0.0647 | 0.0346 | 0.1029 | 0.2684 |
| spermidine                  | 0.1442 | 0.3216 | 0.8422 | 0.2613 | 0.5402 | 0.3626 | 0.5096 | 0.4061 | 0.439  | 0.0837 | 0.4875 | 0.3378 |
| pyridoxal-5-phosphate       | 0.0345 | 0.1207 | 0.7241 | 0.1684 | 0.7026 | 0.2227 | 0.1095 | 0.1127 | 0.1742 | 0.0217 | 0.0618 | 0.1468 |
| 5-methoxytryptamine         | 0.1767 | 0.201  | 0.6329 | 0.1536 | 0.5923 | 0.5006 | 0.2677 | 0.1309 | 0.2422 | 0.0699 | 0.235  | 0.0426 |
| serotonin                   | 0.332  | 0.172  | 0.694  | 0.1333 | 0.6763 | 0.8248 | 0.2748 | 0.1151 | 0.4755 | 0.0147 | 0.1762 | 0.3226 |

**Table S5 Different metabolites extracted by two derivatization methods**

| <b>Class</b>              | <b>37 ° C Derivatization</b> | <b>75 ° C Derivatization</b> |
|---------------------------|------------------------------|------------------------------|
| <b>Carbohydrate</b>       | D-Lyxose                     | erythronicacid               |
|                           | sorbitol                     | lyxitol                      |
|                           | Erythronicacid               | 6-deoxygalactofuranose       |
|                           | pentitol                     | deoxypentitol                |
|                           | threonicacid                 | lyxose                       |
|                           | 1-Deoxypentitol              |                              |
|                           | ribonicacid                  |                              |
|                           | gluconicacidlactone          |                              |
|                           | tartaricacid                 |                              |
|                           | arabitol                     |                              |
|                           | xylulose                     |                              |
|                           | pentonicacid                 |                              |
|                           | 2,3-Dihydroxybutanoicacid    |                              |
|                           | pinitol                      |                              |
|                           | galactitol                   |                              |
|                           | fructose-1-phosphate         |                              |
|                           | fructose-6-phosphate         |                              |
|                           | galactose-6-phosphate        |                              |
|                           | trehalose                    |                              |
|                           | <b>Amino acid</b>            | glutamyl-valine              |
| homoserine                |                              | glutamate                    |
| L-pipecolicacid           |                              | pipecolicacid                |
| methioninesulfoxide       |                              | oxoproline                   |
| 5-Aminovalericacid        |                              | O-acetylserine               |
| L-glutamicacid            |                              | tranexamicacid               |
| glutathione               |                              | cyanoalanine                 |
| creatinine                |                              | 5-aminovalericacid           |
| 2,6-diaminopimelicacid    |                              |                              |
| glycyl-proline            |                              |                              |
| 5-Oxoproline              |                              |                              |
| cysteine-glycine          |                              |                              |
| alpha-aminoadipicacid     |                              |                              |
| glutamine                 |                              |                              |
| trans-4-hydroxy-L-proline |                              |                              |
| glycyltyrosine            |                              |                              |
| <b>Lipid</b>              |                              | lauricacid                   |
|                           | itaconicacid                 | behenicacid                  |
|                           | isopentadecanoicacid         | glycerol-1-phosphate         |
|                           | Beta-Glutamicacid            | glycerol-3-galactoside       |
|                           | 2,3-Diphosphoglycerin        | methylhexose                 |
|                           | Galactosylglycerol           | caprylicacid                 |
|                           | monomyristin                 | dodecanoicacid               |

dehydroabieticacid  
 abieticacid  
 cis-gondoicacid  
 2-monopalmitin  
 cholesterol  
 hexadecylglycerol  
 squalene

| Nucleoside                | thymidine                            |
|---------------------------|--------------------------------------|
| <b>Others</b>             | erythronicacidlactone                |
| 1,2-Dihydroxycyclohexane  | tetracosane                          |
| terephthalicacid          | phenylethylamine                     |
| 2,5-Dihydroxypyrazine     | 2,5-dihydroxypyrazine                |
| 4-hydroxybenzoate         | p-hydroxyphenyllacticacid            |
| tyramine                  | 2-methylglycericacid                 |
| phthalicacid              | agmatine                             |
| Erythronicacidg-lactone   | methyltetrahydrophenanthrenone       |
| dehydroascorbicacid       | hydroquinone                         |
| maleicacid                | alkane                               |
| p-Hydroxyphenyllacticacid | allantoin                            |
| o-toluicacid              | isoxanthopterin                      |
| hippuricacid              | 2-(1-methyl-2-pyrrolidinyl)-pyridine |
|                           | 3-hydroxyphenylaceticacid            |
|                           | urocanicacid                         |

**Table S6 Metabolites with significant differences in abundance under two derivatization (fold change value >2 or <0.5 and p value <0.05)**

| Metabolite name                 | Class        | Fold Change | p.value     |
|---------------------------------|--------------|-------------|-------------|
| alanine                         | Amino acid   | 0.29657     | 5.6705E-06  |
| asparagine                      | Amino acid   | 0.10801     | 8.2125E-06  |
| beta alanine                    | Amino acid   | 8.8574      | 0.000011609 |
| citrulline                      | Amino acid   | 173.55      | 0.000044836 |
| glutamic acid                   | Amino acid   | 4.7451      | 0.00025881  |
| lysine                          | Amino acid   | 5.4908      | 0.00063385  |
| ornithine                       | Amino acid   | 2.4401      | 0.0022579   |
| 1,5-anhydroglucitol             | Carbohydrate | 0.085897    | 9.4579E-08  |
| cellobiose                      | Carbohydrate | 0.17418     | 0.000038209 |
| erythrose                       | Carbohydrate | 0.1913      | 0.000084801 |
| fructose                        | Carbohydrate | 3.5711      | 0.00012287  |
| glucose-6-phosphate             | Carbohydrate | 0.33519     | 0.00019339  |
| glyceric acid                   | Carbohydrate | 0.41374     | 0.00027165  |
| maltose                         | Carbohydrate | 0.23813     | 0.0010991   |
| mannose-6-phosphate             | Carbohydrate | 3.63        | 0.0014524   |
| pyrophosphate                   | Carbohydrate | 4.3689      | 0.011561    |
| ribose                          | Carbohydrate | 2.3378      | 0.01469     |
| tagatose                        | Carbohydrate | 2.0925      | 0.038163    |
| threitol                        | Carbohydrate | 2.781       | 0.041415    |
| 1-monopalmitin                  | Lipid        | 544.79      | 1.7024E-07  |
| arachidic acid                  | Lipid        | 0.28517     | 6.3646E-06  |
| beta-hydroxymyristic acid       | Lipid        | 0.11099     | 0.000024504 |
| capric acid                     | Lipid        | 8.6244      | 0.000033468 |
| diglycerol                      | Lipid        | 2.7989      | 0.000078951 |
| linoleic acid                   | Lipid        | 3.4993      | 0.00046552  |
| nonadecanoic acid               | Lipid        | 5.362       | 0.0015395   |
| oleamide                        | Lipid        | 2.4996      | 0.0019079   |
| palmitic acid                   | Lipid        | 2.3417      | 0.0031963   |
| palmitoleic acid                | Lipid        | 0.34805     | 0.0053449   |
| pelargonic acid                 | Lipid        | 0.31271     | 0.0056841   |
| stearic acid                    | Lipid        | 0.19699     | 0.031468    |
| 5'-deoxy-5'-methylthioadenosine | Nucleoside   | 0.065269    | 4.3859E-07  |
| UDP-N-acetylglucosamine         | Nucleoside   | 2.565       | 0.041996    |
| noradrenaline                   | Other        | 0.1867      | 0.0017371   |
| hexadecane                      | Other        | 7.2375      | 0.00046021  |
| beta-glycerolphosphate          | Other        | 2.4919      | 0.000021358 |
| fumaric acid                    | Other        | 249.78      | 0.00012922  |
| malate                          | Other        | 0.022081    | 0.00064077  |
| N-acetylputrescine              | Other        | 2.8481      | 0.0015196   |
| phosphoenolpyruvate             | Other        | 2.6142      | 0.0068842   |
| succinic acid                   | Other        | 140.42      | 0.035277    |



|                       |       |         |             |
|-----------------------|-------|---------|-------------|
| putrescine            | Other | 2.2023  | 0.0093437   |
| 2,3-dihydroxypyridine | Other | 235.8   | 3.414E-07   |
| 5-methoxytryptamine   | Other | 0.27942 | 1.4724E-06  |
| adenine               | Other | 0.08601 | 3.1925E-06  |
| cytosin               | Other | 11.549  | 0.000053923 |
| nicotinamide          | Other | 2.1138  | 0.0015198   |
| pyridoxal-5-phosphate | Other | 2.4736  | 0.011487    |
| serotonin             | Other | 3.2932  | 0.020381    |

---

**Fig S4 The top 25 metabolites with the most significant difference between the two derivatization through the T test**

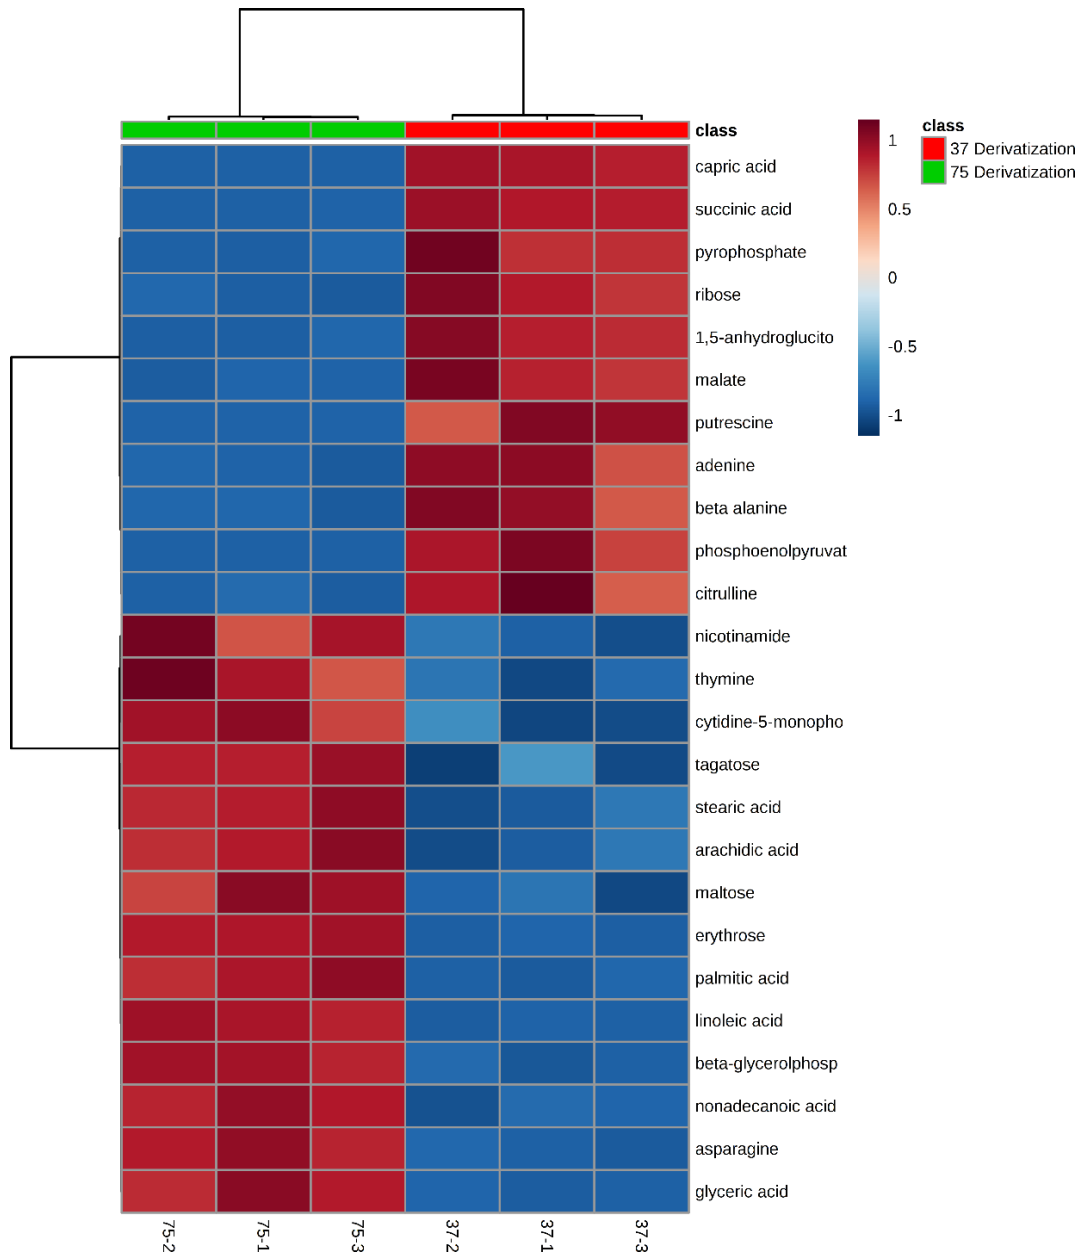

**Table S7 The 31 significant differential metabolites screened by T-test and Z-score**

| <b>Name</b>                      | <b>pvalue</b> | <b>FC</b>   | <b>p.adjust</b> |
|----------------------------------|---------------|-------------|-----------------|
| 1,3-diaminopropane               | 3.45E-07      | 3.875635853 | 1.45E-05        |
| 1-monostearin                    | 7.81E-05      | 2.155699859 | 0.000745623     |
| 2'-deoxycytidine 5'-triphosphate | 0.000548672   | 0.45754465  | 0.002954389     |
| 3-phosphoglycerate               | 1.98E-05      | 2.005092606 | 0.000292726     |
| 4-hydroxybutyric acid            | 0.009326757   | 2.122676347 | 0.02481135      |
| 5-aminovaleric acid              | 0.006273284   | 3.010650663 | 0.018901785     |
| 5-methoxytryptamine              | 0.007605907   | 2.409955598 | 0.021016322     |
| 8-aminocaprylic acid             | 0.012229008   | 2.804345086 | 0.031318192     |
| adenosine-5-monophosphate        | 0.004714149   | 0.405465118 | 0.016499521     |
| citramalic acid                  | 6.05E-05      | 2.417276854 | 0.000635546     |
| conduritol B epoxide             | 0.029184941   | 0.394465882 | 0.059503278     |
| cortexolone                      | 2.12E-05      | 3.078147091 | 0.000292726     |
| cyclohexylamine                  | 0.000108611   | 2.832970113 | 0.000918578     |
| cysteine                         | 0.031108011   | 0.485195845 | 0.062814253     |
| digitoxose                       | 8.57E-07      | 14.33701099 | 2.57E-05        |
| dihydrosphingosine               | 0.03359325    | 0.337497035 | 0.065930678     |
| galactose                        | 0.029050982   | 0.018587216 | 0.059503278     |
| gluconic acid                    | 0.035589383   | 0.397359279 | 0.069201579     |
| glutaric acid                    | 0.003596793   | 2.821482843 | 0.013251343     |
| hydrocortisone                   | 4.95E-06      | 3.698704121 | 0.000103933     |
| levoglucosan                     | 0.012934394   | 2.326065095 | 0.031666707     |
| L-homoserine                     | 3.82E-05      | 2.512823854 | 0.000445227     |
| maleamic acid                    | 0.000672418   | 2.865014057 | 0.003444092     |
| malic acid                       | 9.91E-05      | 3.638789044 | 0.000904592     |
| myristic acid                    | 0.001211002   | 2.739640123 | 0.005779785     |
| N-acetyl-aspartic acid           | 8.37E-07      | 3.911374564 | 2.57E-05        |
| N-cyclohexyl-formamide           | 0.004964466   | 0.039358098 | 0.016842625     |
| nicotinic acid                   | 0.000128635   | 4.241401194 | 0.001038978     |
| oleic acid                       | 5.20E-08      | 2.344865183 | 3.64E-06        |
| ornithine                        | 0.00146322    | 0.361224712 | 0.006828362     |
| palmitoleic acid                 | 3.68E-08      | 3.059500152 | 3.64E-06        |
| phosphogluconic acid             | 0.000257701   | 2.71585674  | 0.001745716     |
| progesterone                     | 1.15E-05      | 2.979291179 | 0.000200997     |
| sedoheptulose                    | 0.014708818   | 0.338921271 | 0.035204704     |
| spermidine                       | 0.01598347    | 2.538790496 | 0.03688493      |
| succinic acid                    | 0.024294009   | 2.0897166   | 0.051812019     |
| thymidine                        | 0.048121241   | 3.02912773  | 0.087873571     |
| xanthine                         | 8.75E-06      | 14.16530794 | 0.000167096     |
| xanthosine                       | 2.58E-06      | 3.676472077 | 6.03E-05        |
